# Supplementary material
Source: PubMed Central journal article supplement (PMC4216144)
Supplement: NIHMS60067-supplement-1.pdf [file NIHMS60067-supplement-1.pdf]

## Supplementary Discussion

Typically in SMFS experiments, rupture force – loading rate plots are used to characterize  $k_{\text{off}}$  and  $\Delta x$ , the unbinding (or unfolding) probability per time unit and the distance to the transition state along the reaction coordinate, respectively, providing direct information about the energy landscape governing protein folding<sup>1</sup>. SMFS experiments are also complemented by all-atom simulations of such systems *in silico*. Recently, it was shown that high speed SMFS experiments could be performed at speeds achievable in molecular dynamics simulations<sup>2</sup>, overcoming a long standing discrepancy between experiment and simulation.

In analyzing single-molecule unfolding curves (i.e., **Fig. 2**), we note that the spotted DNA at the measured array addresses correctly corresponded to the domain of interest encoded by the corresponding spotted DNA at that position. For example, the fibronectin tetramer was measured at array position (237), the spectrin dimer at position (239), the xylanase monomer at position (196), and the sfGFP monomer at position (238), corresponding to the correct genes deposited into the expression chambers at those array positions (**Fig. 2**). Typically 10–15 immobilization chambers per microarray were measured. Typically several thousand force curves were acquired giving rise to dozens of interpretable single-molecule interaction curves.

### Upper force limit

Here we extend the discussion regarding the upper force limit for the SMFS-MITOMI system. In all force-distance data traces, the last rupture events represent unbinding of the Coh-Doc complex, not unfolding of a domain. This rupture force of the Coh-Doc complex represents an upper limit in force for the entire construct, since the Doc is used as a handle sequence grabbed by the Coh-modified cantilever. The system we described can therefore interrogate domains with mechanical rupture forces that lie below that of Coh-Doc (~125 pN at 10 nN/s). If proteins with larger unfolding forces should be investigated, other Coh-Doc domains that show even higher complex rupture forces can be used. The Coh-Doc pair from *R. flavofaciens*, for example (PDB 4IU3) exhibits rupture forces over 600 pN at these loading rates (unpublished data). This could alternatively be used as a handle sequence to interrogate mechanically more stable domains of interest.

Computerized image analysis can be used to automate cantilever positioning above the fluorescent rings and subsequent acquisition of unfolding traces at each array address in combination with online force curve analysis to further increase throughput. Additionally, well-characterized reference proteins on the same chip may serve as calibration standards further minimizing uncertainty in absolute force values.

It is possible to operate the MITOMI device in a simplified way without the need for microspotting template DNA and chip alignment. This manual option should encourage the interested community to apply the suggested method to their single molecule force spectroscopy experiments. MITOMI enables the experimenter to prepare up to 16 different constructs in one column with 40 repeats each by flow-loading the DNA. Since

the valves are pressure sensitive it is also possible to operate these manually. This way it is possible to make use of the parallelized method without having the automation tools. Supplementary Materials & Methods

## DNA Sequences

**Supplementary Table 1.** Overview of primers

|   | Name                       | Sequence                                      |
|---|----------------------------|-----------------------------------------------|
| 1 | FW-w/o C-Tags MCS          | TAACTCGAGTAAGATCCGGCTGC                       |
| 2 | REV-N-Tags MCS             | GCTAGCACTAGTCCATGGGTG                         |
| 3 | FW-Docl GA                 | AAAGTGGTACCTGGTACTCC                          |
| 4 | REV-XylDocl-GA             | CGGATCTTACTCGAGTTAGTTCTTGTACGGCAATGTATC       |
| 5 | FW 10FNIII GA              | CGCACCGGCTCTGGCTCTGGCTCTGTTAGTGATGTTCCGCGTG   |
| 6 | REV 10 FNIII GA            | GGAGTACCAGGTACCACTTTGGTGCG                    |
| 7 | REV 10FNIII (auf GS Li) GA | ACTAACAGAGCCAGAGCCAGAGCCGGTGCATAATTGATTGAAATC |
| 8 | FW sfGFP (auf MCS) GA      | CACCCATGGACTAGTGCTAGCAGCAAAGGTGAAGAACTGTTTAC  |
| 9 | REV sfGFP (auf Docl) GA    | GGAGTACCAGGTACCACTTTCTTATACAGCTCATCCATACCATG  |

**Supplementary Table 2.** Overview of DNA plasmids available at Addgene database

| Addgene ID | Construct                        |
|------------|----------------------------------|
| 58708      | pET28a-ybbR-HIS-sfGFP-Docl       |
| 58709      | pET28a-ybbR-HIS-CBM-Cohl         |
| 58710      | pET28a-StrepII-TagRFP-Cohl       |
| 58711      | pET28a-ybbR-HIS-Xyl-Docl         |
| 58712      | pET28a-ybbR-HIS-10FNIII(x4)-Docl |
| 58713      | pET28a-ybbR-HIS-Spec(x2)-Docl    |

Multiple cloning site for the protein of interest:

*N terminal region*

*T7 promoter* | *lac operator* | *RBS* | *ATG* | *ybbr Tag* | *HRV 3C protease site* | *HIS Tag (x6)*

TAATACGACTCACTATAGG | GGAATTGTGAGCGGATAACAATTCC | CCTGTAGAAATAATTTTGT  
TTAACTTTAAG | AAGGA | GATATACAT | ATG | GGTACC | GACTCTCTGGAATTCATCGCTTCTAA  
ACTGGCT | CTGGAAGTTCTGTTCCAGGGTCCG | CTGCAG | CACCACCACCACCACCAC | CCATGG  
ACTAGTGCTAGC

*C terminal region*

*Dockerin Type I* | *T7 terminator*

AAAGTGGTACCTGGTACTCCTTCTACTAAATTATACGGCGACGTCAATGATGACGGAAAAGTTAA  
CTCAACTGACGCTGTAGCATTGAAGAGATATGTTTTGAGATCAGGTATAAGCATCAACACTGACA  
ATGCCGATTTGAATGAAGACGGCAGAGTTAATTCAACTGACTTAGGAATTTTGAAGAGATATAT  
CTCAAAGAAATAGATACATTTGCCGTACAAGAAC | TAA | CTCGAGTAAGATCCGGCTGCTAACAAA  
GCCCCAAAGGAAGCTGAGTTGGCTGCTGCCACCGCTGAGCAATAA | CTAGCATAACCCCTTGGGG  
CCTCTAAACGGGTCTTGAGGGGTTTTTT

## 10 FibronectinIII (4x):

Glycin-Serin Linker (x6)

GTTAGTGATGTTCCGCGTGATCTGGAAGTTGTTGCAGCAACCCCGACCAGCCTGCTGATTAGCTG  
GGATGCACCGGCAGTTACCGTTCGTTATTATCGTATTACCTATGGTGAAACCGGTGGTAATAGTC  
CGGTTCAAGAATTTACCGTTCGCGGTAGCAAAAGCACCGCAACCATTAGCGGTCTGAAACCGGGT  
GTTGATTACACCATTACCGTTTATGCCGTTACCGGTTCGTTGGTATTACCGGCAAGCAGCAAACC  
GATTAGCATTAACCTATCGTACC GGTAGCGGTAGTGGTAGC GTTTCAGATGTGCCCTCGCGACCTGG  
AAGTGGTGGCTGCCACACCGACCTCACTGCTGATCTCATGGGATGCCCTGCCGTGACCGTGCGC  
TATTATCGCATCACATATGGCGAGACAGGTGGCAATTCACCTGTGCAAGAATTCACAGTTCCTGG  
TTCAAAAAGTACCGCCACAATTTCTGGCCTGAAACCTGGCGTGGATTACACAATCACAGTGTATG  
CAGTGACAGGTTCGCGGTGATAGTCCGGCAAGTTCAAAACCGATTCAATCAATTATCGCACC GGC  
TCTGGCTCTGGCTCT GTTAGTGATGTTCCGCGTGATCTGGAAGTTGTTGCAGCAACCCCGACCAG  
CCTGCTGATTAGCTGGGATGCACCGGCAGTTACCGTTCGTTATTATCGTATTACCTATGGTGAAA  
CCGGTGGTAATAGTCCGGTTCAGAATTTACCGTTCGCGGTAGCAAAAGCACCGCAACCATTAGC  
GGTCTGAAACCGGGTGTGATTACACCATTACCGTTTATGCCGTTACCGGTTCGTTGGTATTACCC  
GGCAAGCAGCAAACCGATTAGCATTAACCTATCGTACC GGTAGCGGTAGTGGTAGC GTTTCAGATG  
TGCCCTCGCGACCTGGAAGTGGTGGCTGCCACACCGACCTCACTGCTGATCTCATGGGATGCCCT  
GCCGTGACCGTGCCTATTATCGCATCACATATGGCGAGACAGGTGGCAATTCACCTGTGCAAGA  
ATTCACAGTTCCTGGTTCAAAAAGTACCGCCACAATTTCTGGCCTGAAACCTGGCGTGGATTACA  
CAATCACAGTGTATGCAGTGACAGGTTCGCGGTGATAGTCCGGCAAGTTCAAAACCGATTCAATC  
AAttatTCGCACC

**sfGFP:**

AGCAAAGGTGAAGAAGCTGTTTACCGGTGTTGTTCCGATTCTGGTTGAACTGGATGGTGTATGTTAA  
TGGCCACAAATTTTCAGTTCGTGGTGAAGGCGAAGGTGATGCAACCATTTGGTAAACTGACCCTGA  
AATTTATCTGTACCACCGGCAAACCTGCCGGTTCCTGGCCGACCCTGGTTACCACCTGACCTAT  
GGTGTTCAGTGTTTTAGCCGTTATCCGGATCATATGAAACGCCACGATTTTTTTCAAAGCGCAAT  
GCCGGAAGGTTATGTTCAAGAACGTACCATCTCCTTTAAAGACGACGGTAAATACAAAACCCGTG  
CCGTGTTAAATTTGAAGGTGATACCCTGGTGAATCGCATTGAACTGAAAGGCACCGATTTTAAA  
GAGGATGGTAATATCCTGGGCCACAACTGGAATATAATTTCAATAGCCACAACGTGTATATCAC  
CGCAGACAAACAGAAAAATGGCATCAAAGCCAATTTTACCCTGCGCCATAATGTTGAAGATGGTA  
GCGTGCAGCTGGCAGATCATTATCAGCAGAATACCCCGATTGGTGTATGGTCCGGTTCTGCTGCCG  
GATAATCATTTATCTGAGCACCAGACCGTTCTGAGCAAAGATCCGAATGAAAAACGTGATCATAT  
GGTGTGCATGAGTATGTTAATGCAGCAGGTATTACCCATGGTATGGATGAGCTGTATAAG

**alpha-Spectrin repeat 16 (chicken brain) (x2):**

**Glycin-Serine Linker (x6)**

CGTGCTAAACTGAACGAATCTCACCGTCTGCACCAGTTCTTCCGTGACATGGACGACGAAGAATC  
TTGGATCAAAGAAAAAAACTGCTGGTTTCTTCTGAAGACTACGGTTCGTGACCTGACCGGTGTTT  
AGAACCTGCGTAAAAAACACAAACGTCTGGAAGCTGAACTGGCTGCTCACGAACCGGCTATCCAG  
GGTGTTCCTGGACACCGGTAAAAAACTGTCTGACGACAACACCATCGGTAAAGAAGAAATCCAGCA  
GCGTCTGGCTCAGTTCGTTGACCACTGGAAAGAACTGAAACAGCTGGCTGCTGCTCGTGGTCCAGC  
GTCTGGAAGAATCTCTGGAATACGGTAGCGGTAGCGGTTACCGTGCTAAACTGAACGAATCTCAC  
CGTCTGCACCAGTTCTTCCGTGACATGGACGACGAAGAATCTTGGATCAAAGAAAAAAACTGCT  
GGTTTCTTCTGAAGACTACGGTTCGTGACCTGACCGGTGTTTCAAGAACTGCGTAAAAAACACAAAC  
GTCTGGAAGCTGAACTGGCTGCTCACGAACCGGCTATCCAGGGTGTTCCTGGACACCGGTAAAAAA  
CTGTCTGACGACAACACCATCGGTAAAGAAGAAATCCAGCAGCGTCTGGCTCAGTTCGTTGACCA  
CTGGAAGAAGCTGAAACAGCTGGCTGCTGCTCGTGGTCCAGCGTCTGGAAGAATCTCTGGAATA

**Xylanase:**

AAGAATGCAGATTCCTATGCGAAAAAACCTCACATCAGCGCATTGAATGCCCCACAATTGGATCA  
ACGCTACAAAACGAGTTCACGATTTGGTGCAGCAGTAGAACCTTATCAACTACAAAATGAAAAAG  
ACGTACAAATGCTAAAGCGCCACTTCAACAGCATTTGTTGCCGAGAACGTAATGAAACCGATCAGC  
ATTC AACCTGAGGAAGGAAAATTC AATTTTGAACAAGCGGATCGAATTGTGAAGTTCGCTAAGGC  
AAATGGCATGGATATTCGCTTCCATACACTCGTTTGGCACAGCCAAGTACCTCAATGGTTCCTTTC  
TTGACAAGGAAGGTAAGCCAATGGTTAATGAATGCGATCCAGTGAACGTGAACAAAATAAACAA  
CTGCTGTTAAACGACTTGAAACTCATATTAACGATCGTTCGAGCGGTACAAAGATGACATTAA  
GTACTGGGACGTTGTAATGAGGTGTGGGGGACGACGGAAAACTGCGCAACTCTCCATGGTATC  
AAATCGCCGGCATCGATTATATTAAGTGGCATTCCAAGCAGCTAGAAAATATGGCAGGAGACAAC  
ATTAAGCTTTACATGAATGATTACAATACAGAAGTCGAACCGAAGCGAACCCTCTTTACAATTT  
AGTCAAACAACCTGAAAGAAGAGGGTGTTCGATCGACGGCATCGGCCATCAATCCACATCCAAA  
TCGGCTGGCCTTCTGAAGCAGAAATCGAGAAAACGATTAACATGTTTCGCGCTCTCGGTTTAGAC  
AACCAAATCACTGAGCTTGATGTGAGCATGTACGGTTGGCCGCCGCGCTTACCCGACGTATGA  
CGCCATTCCAAAACAAAAGTTTTTGGATCAGGCAGCGCGCTATGATCGTTTGTTCAAACTGTATG  
AAAAGTTGAGCGATAAAATTAGCAACGTCACCTTCTGGGGCATCGCCGACAATCATACGTGGCTC  
GACAGCCGTGCGGATGTGTACTATGACGCCAACGGGAATGTTGTGGTTGACCCGAACGCTCCGTA  
CGCAAAAGTGGAAAAAGGGAAAGGAAAAGATGCGCCGTTCTGTTTTTGGACCGGATTACAAAGTCA  
AACCCGCATATTGGGCTATTATCGACCAC

## Detection construct RFP-Cohesin:

TagRFP-Cohesin:

*T7 promoter* | *lac operator* | *RBS* | *ATG* | *StrepII Tag* | *TagRFP* |  
*Linker* | *Cohesin* | *T7 terminator*

```
TAATACGACTCACTATAGG | GGAATTGTGAGCGGATAACAATTCC | CCTGTAGAAATAATTTTGT  
TTAACTTTAAG | AAGGA | GATATACAT | ATG | GGTACC | TGGTCTCACCCGCAGTTCGAAAAA | G  
TTTCTAAAGGTGAAGAAGTATGATCAAAGAAAACATGCACATGAAACTGTACATGGAAGGTACTGTT  
AACAACCACCACTTCAAATGCACCTCTGAAGGTGAAGGTAAACCGTACGAAGGTACTCAGACCAT  
GCGTATCAAAGTTGTTGAAGGTGGTCCGCTGCCGTTTCGCTTTTCGACATCCTGGCTACCTCTTTCA  
TGTACGGTTCCTGACCTTCATCAACCACACCCAGGGTATCCCGGACTTCTTCAAACAGTCTTTC  
CCGGAAGGTTTACCTGGGAACGTGTTACCACCTACGAAGACGGTGGTGTCTGACCGCTACCCA  
GGACACCTCTCTGCAAGACGGTTGCCTGATCTACAACGTTAAAAATCCGTGGTGTAACTTCCCGT  
CTAACGGTCCGGTTATGCAGAAAAAACCCCTGGGTTGGGAAGCTAACACCGAAATGCTGTACCCG  
GCTGACGGTGGTCTGGAAGGTCGTTCTGACATGGCTCTGAAACTGGTTGGTGGTGGTGCCTGAT  
CTGCAACTTCAAACCACCTACCGTTCTAAAAAACCGGCTAAAAACCTGAAAATGCCGGGTGTTT  
ACTACGTTGACCACCGTCTGGAACGTATCAAAGAAGCTGACAAAGAAACCTACGTTGAACAGCAC  
GAAGTTGCTGTTGCTCGTTACTGCGACCTGCCGTCTAAACTGGGTCACAAACCTGAAC | GGCAGTG  
TAGTACCATCAACACAGCCTGTAACAACACCACCTGCAACAACAAAACCACTGCAACAACAATA  
CCGCCGTCAGATGATCCGAATGCA | GGATCCGACGGTGTGGTAGTAGAAATTGGCAAAGTTACGG  
GATCTGTTGGAAGTACAGTTGAAATACCTGTATATTTTCAGAGGAGTTCCATCCAAAGGAATAGCA  
AACTGCGACTTTGTGTTTCAGATATGATCCGAATGTATTGGAAATATAGGGATAGATCCCGGAGA  
CATAATAGTTGACCCGAATCCTACCAAGAGCTTTGATACTGCAATATATCCTGACAGAAAGATAA  
TAGTATTCCCTGTTTGCAGGAAGACAGCGGAACAGGAGCGTATGCAATAACTAAAGACGGAGTATTT  
GCAAAAATAAGAGCAACTGTAAAAATCAAGTGCTCCGGGCTATATTACTTTCGACGAAGTAGGTGG  
ATTTGCAGATAATGACCTGGTAGAACAGAAGGTATCATTTATAGACGGTGGTGTAAACGTTGGCA  
ATGCAACA | TAA | CTCGAGTAAGATCCGGCTGCTAACAAAGCCCGAAAGGAAGCTGAGTTGGCTG  
CTGCCACCGCTGAGCAATAA | CTAGCATAACCCCTTGGGGCCTCTAAACGGGTCTTGAGGGGTTT  
TTT
```

## Molecular weights of synthesized fusion proteins

ybbR-(Fibronectin)<sub>4</sub>-Dockerin Type I: 53 kDa

ybbR-(Spectrin)<sub>2</sub>-Dockerin Type I: 40 kDa

ybbR-Xylanase-Dockerin Type I: 56 kDa

ybbR-sfGFP-Dockerin Type I: 39 kDa

ybbR-Twitchin-Dockerin Type I: 52 kDa

**Supplementary Table 3.** Yield of interpretable curves

| <b>Construct</b> | <b>Interpretable Curves</b> |
|------------------|-----------------------------|
| GFP              | 25 out of 15258 = 0.16 %    |
| Fibronectin      | 27 out of 26653 = 0.1 %     |
| Xylanase         | 91 out of 5553 = 1.64 %     |
| Spectrin         | 50 out of 10344 = 0.48%     |

## References

1. Merkel, R., Nassoy, P., Leung, A., Ritchie, K. & Evans, E. Energy landscapes of receptor–ligand bonds explored with dynamic force spectroscopy. *Nature* **397**, 50–53 (1999).
2. Rico, F., Gonzalez, L., Casuso, I., Puig-Vidal, M. & Scheuring, S. High-Speed Force Spectroscopy Unfolds Titin at the Velocity of Molecular Dynamics Simulations. *Science* **342**, 741–743 (2013).
